# Whole Genome Analysis of the *OsGRF* Gene Family Encoding Plant-Specific Putative Transcription Activators in Rice (*Oryza sativa* L.)

Dongsu Choi<sup>1</sup>, Jeong Hoe Kim<sup>1</sup> and Hans Kende<sup>1,2,3</sup>

<sup>1</sup> Department of Energy Plant Research Laboratory, Michigan State University, East Lansing, MI 48824-1312, U.S.A.

<sup>2</sup> Department of Plant Biology, Michigan State University, East Lansing, MI 48824-1312, U.S.A.

***OsGRF1* (*Oryza sativa* GROWTH-REGULATING FACTOR1) is a rice gene encoding a putative novel transcriptional regulator. We identified and characterized eleven homologs of *OsGRF1* in the rice genome. All twelve *OsGRF* proteins have two highly conserved regions, the QLQ (Gln, Leu, Gln) and WRC (Trp, Arg, Cys) domains, and sequences reminiscent of transcription factors. *OsGRF* genes were preferentially expressed in young and growing tissues, and applied gibberellic acid (GA<sub>3</sub>) enhanced the expression of seven *OsGRF* genes. In situ hybridization showed high levels of *OsGRF1* transcripts in the shoot apical meristem and in cells surrounding the vasculature of the intercalary meristem. In a GAL4-based yeast assay, the C-terminal region of *OsGRF1* was found to have transactivation activity. These results indicate that *OsGRF1* acts as a transcriptional activator. Based on the in situ expression pattern of *OsGRF1*, we postulate that it may be involved in regulating vegetative growth in rice.**

**Keywords:** Gibberellin — In situ hybridization — *Oryza sativa* — Transcription activation.

Abbreviations: GA, gibberellin; GA<sub>3</sub>, gibberellic acid.

The nucleotide sequences reported in this paper have been submitted to the GenBank TPA database under accession numbers BK004856-BK004863 (*OsGRF1-OsGRF8*) and BK004878-BK004881 (*OsGRF9-OsGRF12*).

## Introduction

Deepwater rice is a subsistence crop in flood-prone areas of Southeast Asia because it has the capacity to elongate rapidly when the floodwaters rise during the monsoon season (Kende et al. 1998). This growth response is mediated by the interaction of three plant hormones, ethylene, abscisic acid, and gibberellin (GA), with GA being the ultimate growth-promoting factor (Raskin and Kende 1984).

Previously, we identified a gene, *OsGRF1* (*Oryza sativa* GROWTH-REGULATING FACTOR1; GenBank accession number AF201895), whose expression in the internode of deepwater rice is rapidly induced by gibberellic acid (GA<sub>3</sub>; van

der Knaap et al. 2000). The *OsGRF1* protein was proposed to be a novel transcriptional regulator because it is targeted to the nucleus and has structural features of transcription factors (van der Knaap et al. 2000). Besides the conserved QLQ and WRC domains in its N-terminal region, the *OsGRF1* protein has regions rich in histidine and acidic amino acid residues in its C-terminal region (van der Knaap et al. 2000). The amino acid sequence of the QLQ domain is similar to a protein–protein interaction domain of SWI2/SNF2, which is a core component of the SWI/SNF chromatin-remodeling complex in yeast (Treich et al. 1995). The WRC domain contains a functional nuclear localization signal and a putative zinc finger motif found in a transcriptional repressor of barley (Raventós et al. 1998). Many transcription factors in yeast, *Drosophila*, and humans contain regions with acidic amino acids in their activation domains (Escher et al. 2000, Vaquero et al. 2000). It is, therefore, conceivable that the acidic amino acid region of *OsGRF1* may also serve as a transactivation domain.

When the *OsGRF1* gene was expressed in *Arabidopsis*, stem elongation was severely inhibited, which very likely resulted from interference of the heterologous *OsGRF1* protein with its *Arabidopsis* homolog. In *Arabidopsis*, we identified and characterized nine *AtGRF* genes (Kim et al. 2003) and showed, using T-DNA insertional mutants and transgenic plants overexpressing *AtGRF* genes, that *AtGRF* proteins are involved in regulating growth of cotyledons and leaves.

DNA gel blots of rice genomic DNA probed with *OsGRF1* cDNA indicated that there may be at least two more *OsGRF1* homologs in the rice genome (van der Knaap et al. 2000). The availability of the nearly complete genome sequence of *Japonica* and *Indica* rice (Goff et al. 2002, Yu et al. 2002) prompted us to identify and characterize all homologs of *OsGRF1*.

In this study, we describe the identification and expression pattern of the *OsGRF* gene family, which consists of 12 members, and the in situ localization of *OsGRF1* mRNA. We also demonstrate that the C-terminal region of *OsGRF1* has transactivation activity, indicating that *OsGRF1* functions as a transcriptional activator. Because *OsGRF1* expression is high in meristematic tissues and developing organs, we postulate that *OsGRF1* may be involved in regulating growth processes in rice plants via transcriptional control.

<sup>3</sup> Corresponding author: E-mail, hkende@msu.edu; Fax, +1-517-353-9168.

**Table 1** GRF genes in rice and *Arabidopsis*

| Gene name      | Accession no./<br>AGI gene code       | Chromosome<br>no. | No. of<br>introns | No. of<br>amino acids | EST accession<br>no.                         | EST tissues                                              |
|----------------|---------------------------------------|-------------------|-------------------|-----------------------|----------------------------------------------|----------------------------------------------------------|
| <i>OsGRF1</i>  | AP004140<br>AP005538<br>TPA: BK004856 | II                | 2                 | 396                   | AK109652                                     | Panicle                                                  |
| <i>OsGRF2</i>  | AP005652<br>TPA: BK004857             | VI                | 2                 | 301                   | None                                         | –                                                        |
| <i>OsGRF3</i>  | AL606683<br>TPA: BK004858             | IV                | 4                 | 439                   | AU182732<br>AU086039<br>D40475               | Panicle<br>Etiolated shoot<br>Etiolated shoot            |
| <i>OsGRF4</i>  | AP003994<br>TPA: BK004859             | II                | 3                 | 394                   | AK063983                                     | Callus                                                   |
| <i>OsGRF5</i>  | AP002837<br>TPA: BK004860             | VI                | 3                 | 348                   | AK103580                                     | Callus                                                   |
| <i>OsGRF6</i>  | AC120983<br>TPA: BK004861             | III               | 2                 | 456                   | AK073578                                     | Callus                                                   |
| <i>OsGRF7</i>  | AL928744<br>TPA: BK004862             | XII               | 4                 | 490                   | None                                         | –                                                        |
| <i>OsGRF8</i>  | AC134624<br>TPA: BK004863             | XI                | 3                 | 409                   | AK103055                                     | Callus                                                   |
| <i>OsGRF9</i>  | AC079830<br>TPA: BK004878             | III               | 3                 | 426                   | AK058659<br>C97043                           | Green shoot<br>Callus                                    |
| <i>OsGRF10</i> | AP004394<br>AP005823<br>TPA: BK004879 | II                | 2                 | 211                   | AK108170                                     | Panicle                                                  |
| <i>OsGRF11</i> | AP005180<br>TPA: BK004880             | VII               | 2                 | 269                   | AK066400<br>D40170<br>AU174496               | Shoot<br>Etiolated shoot<br>Seed                         |
| <i>OsGRF12</i> | AL606640<br>TPA: BK004881             | VI                | 2                 | 236                   | AK110934                                     | Callus, shoot                                            |
| <i>AtGRF1</i>  | At2g22840                             | II                | 3                 | 530                   | AV535568<br>AV565229                         | Flower buds<br>Siliques                                  |
| <i>AtGRF2</i>  | At4g37740                             | IV                | 3                 | 535                   | AV533716<br>N95873<br>AV556194               | Flower buds<br>Hypocotyl<br>Siliques                     |
| <i>AtGRF3</i>  | At2g36400                             | II                | 3                 | 398                   | BE525851<br>AU229414                         | Developing seed<br>De/rehydration                        |
| <i>AtGRF4</i>  | At3g52910                             | III               | 3                 | 380                   | AV534635<br>BE522365<br>AU235651<br>AU238279 | Flower buds<br>Developing seed<br>Root<br>De/rehydration |
| <i>AtGRF5</i>  | At3g13960                             | III               | 3                 | 397                   | BE527125                                     | Developing seed                                          |
| <i>AtGRF6</i>  | At2g06200                             | II                | 2                 | 244                   | AV815517                                     | Various developmental stages                             |
| <i>AtGRF7</i>  | At5g53660                             | V                 | 2                 | 365                   | None                                         | –                                                        |
| <i>AtGRF8</i>  | At4g24150                             | IV                | 3                 | 430                   | None                                         | –                                                        |
| <i>AtGRF9</i>  | At2g45480                             | II                | 3                 | 431                   | AY074647                                     | Various developmental stages                             |

Accession numbers and AGI gene codes are from National Center for Biotechnology Information. Accession numbers including TPA database numbers are given to rice genes, and AGI gene codes are given to *Arabidopsis* genes.

## Results

### Identification and sequence analysis of the *OsGRF* gene family

To identify homologs of *OsGRF1* in the rice genome, we searched the rice EST and genomic sequence databases using the tBLASTn algorithm (Altschul et al. 1997) with the N-terminal amino acid sequence (Pro<sub>18</sub> to Ala<sub>136</sub>) of *OsGRF1* as query. Sequences encoding both the QLQ and WRC domains (van der Knaap et al. 2000, Kim et al. 2003) with an E value under 10e-10 were selected from the databases and analyzed with a combination of the rice gene automatic annotation system (Sakata et al. 2002) and the rice full-length EST database. These analyses resulted in the identification of the *OsGRF* gene family consisting of twelve members, *OsGRF1* through 12, ten of which corresponded to cDNA sequences in the EST databases (Table 1). The sequence of the *OsGRF2* cDNA was confirmed by sequencing of its RT-PCR product. *OsGRF7* was identified as a genomic sequence only, although we found it to be expressed (see Fig. 3 and 4). EST clones corresponding to *OsGRF* genes were obtained from a variety of rice tissues, such as flowering panicles, shoots, and calli (Table 1). *OsGRF* genes are dispersed on chromosomes 2, 3, 4, 6, 7, 11, and 12 (Table 1).

All *OsGRF* proteins contain the highly conserved QLQ and WRC domains in their N-terminal region (Fig. 1A, B). The C-terminal regions show 4.1–60.2% amino acid identity to each other, with higher identity in the same subgroup of the phylogenetic tree (see below). *OsGRF1* through 5 share a short stretch of amino acid residues, the TQL (Thr, Gln, Leu) domain, in their C-terminal region (Fig. 1C, D). *OsGRF10*, 11, and 12 have very short C-terminal regions consisting, respectively, of 33, 50, and 53 amino acids from the end of the WRC domain (Fig. 1D).

The phylogenetic analysis of *OsGRF* and *AtGRF* proteins showed that they fall into three subfamilies: A, *OsGRF1* through 5; B, *OsGRF6* through 9; C, *OsGRF10* through 12 (Fig. 2). *OsGRF* proteins in the A and B subfamilies are closely related to the *Arabidopsis* homologs *AtGRF1*, 2, 5, and 6 but remotely related to *AtGRF3*, 4, 7, and 8.

### Differential gene expression patterns within the *OsGRF* gene family

We examined the expression pattern of *OsGRF* genes in various tissues by RNA gel blot analysis using gene-specific probes (Fig. 3). In adult plants, the transcript levels were examined in a 1-cm region containing the highest node and the shoot apical meristem; in the basal 1-cm region of the uppermost internode, which contains the intercalary meristem and the lower part of the elongation zone; and in elongating young leaves. In 4-day-old seedlings, the transcript levels were examined in the coleoptile, the mesocotyl, the primary leaf, and the apical 5-cm region of the roots. The majority of *OsGRF* genes were expressed in the highest node, the basal 1-cm region of

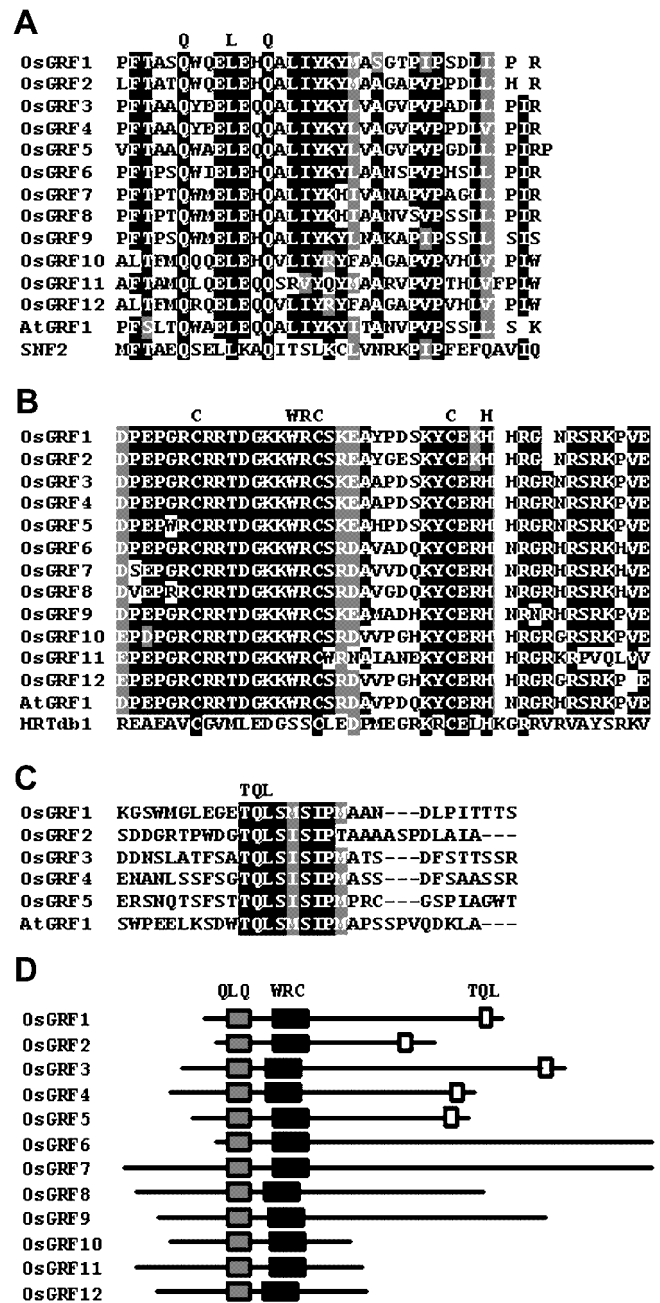

**Fig. 1** Comparison of the amino acid sequences of *OsGRF* proteins. (A) The QLQ domains of *OsGRF*, *AtGRF1*, and yeast SWI2/SNF2 proteins. (B) The WRC domains of *OsGRF* and *AtGRF1* proteins. The DNA-binding domain of the barley HRT protein (*HRTdb1*) with the Cys<sub>3</sub>His zinc-finger motif (Raventós et al. 1998) is aligned. (C) The TQL domains of *OsGRF* and *AtGRF1* proteins. (D) Structure of *OsGRF* proteins. The solid lines show the size of each protein. The gray, black, and white boxes indicate the QLQ, WRC, and TQL domains, respectively.

the highest internode, and in rapidly growing primary leaves. *OsGRF* genes were expressed very weakly or below detection level in root tissues. Of all *OsGRF* members, the transcript

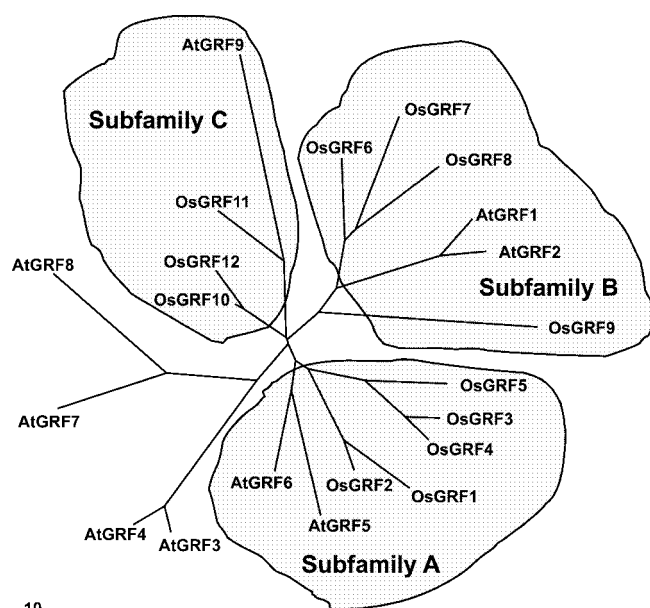

10

**Fig. 2** Unrooted phylogenetic tree of GRF proteins of rice and *Arabidopsis*. The deduced full-length amino acid sequences were used to create alignments of OsGRF and AtGRF proteins with the ClustalW program. The unrooted phylogenetic tree was generated and displayed by the MegAlign program (DNASTAR) and TreeView program (version 1.6.6, Roderic DM). The bar indicates 10 nucleotide substitutions.

level of *OsGRF3* was highest, especially at the seedling stage. *OsGRF2* and *OsGRF10* were highly expressed in elongating leaves of adult plants. We tested the effect of GA<sub>3</sub> on the expression of *OsGRF* genes in the primary target tissue of GA, namely the internodal region containing the intercalary meristem and part of the elongation zone (Fig. 4). The transcript levels of *OsGRF1*, 2, 3, 7, 8, 10, and 12 increased 4- to 10-fold in response to GA<sub>3</sub> application, whereas that of *OsGRF9* decreased 4-fold. The expression of other *OsGRF* genes was not affected by GA<sub>3</sub> treatment.

#### *In situ* localization of *OsGRF1* mRNA

The spatial localization of *OsGRF1* mRNA was analyzed by *in situ* mRNA hybridization. An antisense probe for *OsGRF1* mRNA showed strong hybridization signals in the shoot apical meristem, leaf primordia, and emerging leaves in the uppermost node, whereas the sense probe did not show any signal above background (Fig. 5A). *OsGRF1* mRNA was preferentially localized in the epidermis and in the tissues surrounding vascular bundles of the intercalary meristem of the internode and in adventitious roots of the second highest node (Fig. 5B, C).

#### The C-terminal region of *OsGRF1* has transactivation activity

To test whether OsGRF1 has transactivation activity, we employed the yeast GAL4 system in which a transactivating protein fused to the GAL4 DNA-binding domain activates the *HIS* and *lacZ* reporter genes, enabling yeast cells to grow on

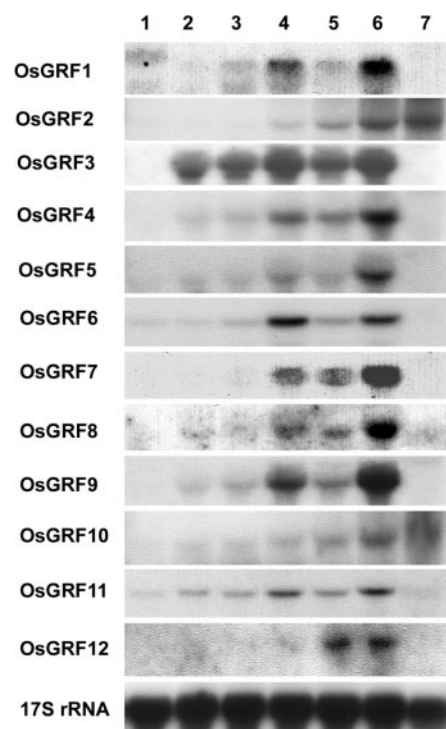

**Fig. 3** Organ-specific expression of the *OsGRF* genes in rice. Roots, mesocotyls, coleoptiles, and primary leaves were excised from 4-day-old seedlings of deepwater rice. The internode section, the uppermost node, and expanding leaves were excised from 11- to 13-week-old deepwater rice plants. Each lane contained 20 µg of total RNA isolated from the tissues indicated above the lanes. 17S rRNA was used as internal loading control. 1, roots; 2, mesocotyls; 3, coleoptiles; 4, primary leaves; 5, a 1-cm region at the base of the highest internode containing the intercalary meristem and part of the elongation zone; 6, a 1-cm region containing the highest node and the shoot apical meristem; 7, expanding leaves.

histidine-deficient medium and to show a positive color reaction in the β-galactosidase assay. Yeast cells expressing the full-length OsGRF1 protein fused to GAL4 DNA-binding domain grew well on histidine-deficient medium and showed a strong color reaction in the β-galactosidase assay, indicating that OsGRF1 has transactivation activity (Fig. 6, construct F). The C-terminal region of the protein also showed activation of both reporter genes (Fig. 6, constructs T3 and T8), whereas the N-terminal regions containing the QLQ and WRC domains showed no transactivation activity (Fig. 6, constructs T1 and T2), indicating that the transactivation activity resides in the C-terminal part of the protein and not in the QLQ or WRC domains. However, the truncated versions of the C-terminal region lacking the last 48 amino acids did not show any activity (Fig. 6, construct T4 and T6), and neither did the region comprised of the 95 C-terminal amino acids (Fig. 6, construct T7). These results indicate that the 48 C-terminal amino acids are necessary but not sufficient for transactivation activity. The essential minimal region for transactivation is, therefore, contained in the region between amino acids 221 and 396, which is

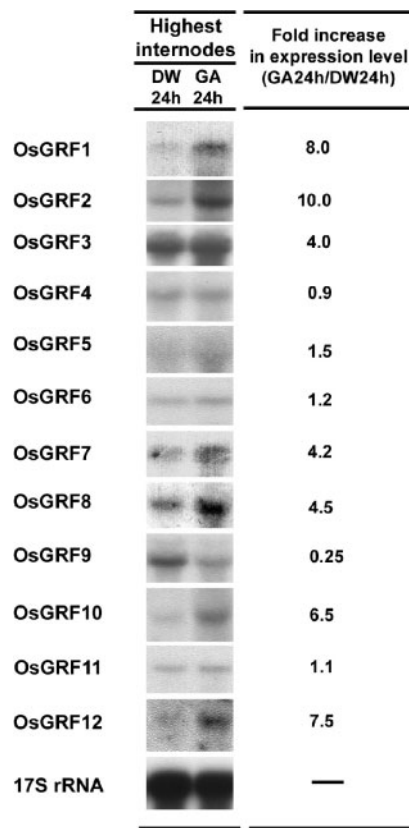

**Fig. 4** Expression of *OsGRF* genes in the highest internode of  $\text{GA}_3$ -treated stem sections. Stem sections were first incubated for 8 h in distilled water to dissipate the wound and endogenous  $\text{GA}$  effect and were then transferred to 50  $\mu\text{M}$   $\text{GA}_3$  or distilled water and incubated for 24 h. Each lane contained 20  $\mu\text{g}$  of total RNA isolated from a 1-cm region at the base of the highest internode containing the intercalary meristem and part of the elongation zone. 17S rRNA was used as loading control. The relative expression levels were calculated from PhosphorImager values.

enriched in histidine and acidic amino acids and contains a sequence of homopolymeric glutamines.

## Discussion

About 77% of rice genes are considered to belong to multigene families with at least two members (Goff et al. 2002). The *GRF* genes form multigene families with twelve members in rice (Fig. 1, 2; Table 1) and nine members in *Arabidopsis* (Kim et al. 2003). Besides the conserved QLQ and WRC domains in their N-terminal regions (van der Knaap et al. 2000, Kim et al. 2003; Fig. 1), all rice and *Arabidopsis* GRF proteins contain, in their variable C-terminal parts, amino acid motifs that are frequently found in transcription factors, namely regions rich in Pro, Gln, His, Ala/Gly, and Ser/Thr (Fig. S1; Mitchell and Tjian 1989, Gerber et al. 1994, Vaquero et al. 2000, Yanagisawa 2001, Tamai et al. 2002). Based on these

motifs and the presence of a functional nuclear localization signal in OsGRF1 (van der Knaap et al. 2000), it has been suggested that GRF proteins may act as transcriptional regulators (van der Knaap et al. 2000, Kim et al. 2003). Our result showing that the C-terminal region of OsGRF1 activates transcription of the *HIS* and *LacZ* reporter genes in the yeast GAL4 system (Fig. 6) supports this hypothesis. The C-terminal regions of AtGRF1, 2, and 5 also exhibit transactivation activity (Kim and Kende, unpublished results). Our data indicate that the GRF proteins are a novel type of plant transcription factors.

The OsGRF proteins fall into three subfamilies, A, B, and C (Fig. 2). AtGRF1, 2, 5, and 6 are closely related to OsGRF proteins in subfamilies A and B, which may reflect duplication events of ancestral genes and, perhaps, functional relatedness. The number and length of introns and the exon-intron organization of the *Arabidopsis* and rice *GRF* genes are not conserved, even within the same subfamily, and *GRF* genes are randomly distributed over the genome (Table 1; data for intron lengths not shown). This fact indicates that gene duplications in the *GRF* family did not occur recently. In contrast, many *Arabidopsis* and rice expansin genes are tandemly repeated on the same chromosome and have well-conserved exon/intron organization (Lee et al. 2001).

*OsGRF1* was identified as a gene whose expression increased during  $\text{GA}$ -induced internodal elongation of deepwater rice (van der Knaap et al. 2000). In the present study, we found that treatment with  $\text{GA}_3$  enhanced the expression of six other *OsGRF* genes, reduced the expression of one, and did not affect the expression of four (Fig. 4). This result indicates that not all GRF proteins are involved in the  $\text{GA}$  response of deepwater rice. The expression of *AtGRF* genes in *Arabidopsis* was not affected by treatment with  $\text{GA}_3$  (Kim et al. 2003).

Both rice and *Arabidopsis* *GRF* genes are highly expressed in meristematic tissues of the shoot (Fig. 3; Kim et al. 2003). Whereas seven of nine *AtGRF* genes are expressed in the meristematic region of the roots, only two of twelve *OsGRF* genes are expressed in roots, and only at low levels. This difference in *GRF* gene expression indicates that GRF proteins may have different roles in the growth and development of *Arabidopsis* and rice roots. In situ hybridization showed two distinct localization patterns of *OsGRF1* transcripts (Fig. 5). First, we found high levels of *OsGRF1* mRNA in cells of the epidermis and in vascular bundles of the intercalary meristem. Second, we observed *OsGRF1* mRNA accumulation in regions of organ formation such as leaf and adventitious primordia. Based on these results, we propose that OsGRF1, and perhaps other OsGRF proteins, play a role in the meristem function and organ formation.

In conclusion, we identified the rice *GRF* gene family consisting of 12 genes encoding putative transcription regulators. OsGRF1 has transcription activation activity in its C-terminal half, and OsGRF proteins may act as transcription activators in growth and development of rice.

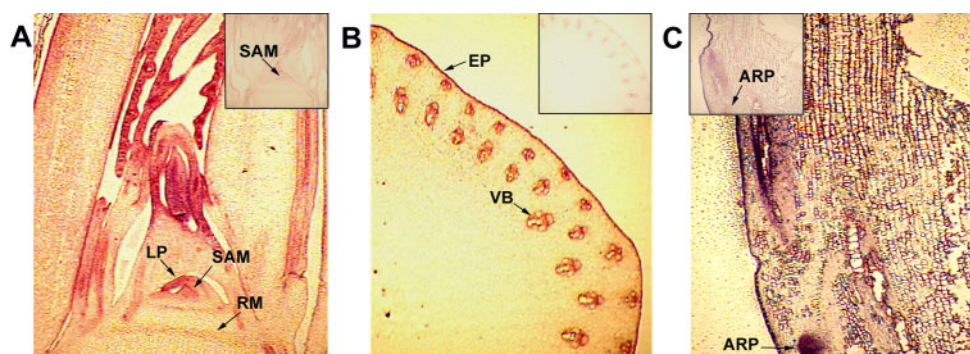

**Fig. 5** Localization of *OsGRF1* mRNA by in situ hybridization in the uppermost node and in the intercalary meristem of a deepwater rice internode. Hybridizations with an antisense probe for *OsGRF1*: (A) in a longitudinal section from the shoot apical region of the uppermost node; (B) in a cross-section from the intercalary meristem of the highest internode; (C) in a longitudinal section from the highest internode that included the intercalary meristem. Hybridizations with a sense probe are in the inserts (upper right corner in A and B, upper left corner in C). ARP, adventitious root primordium; EP, epidermis; LP, leaf primordium; RM, rib meristem; SAM, shoot apical meristem; VB, vascular bundle.

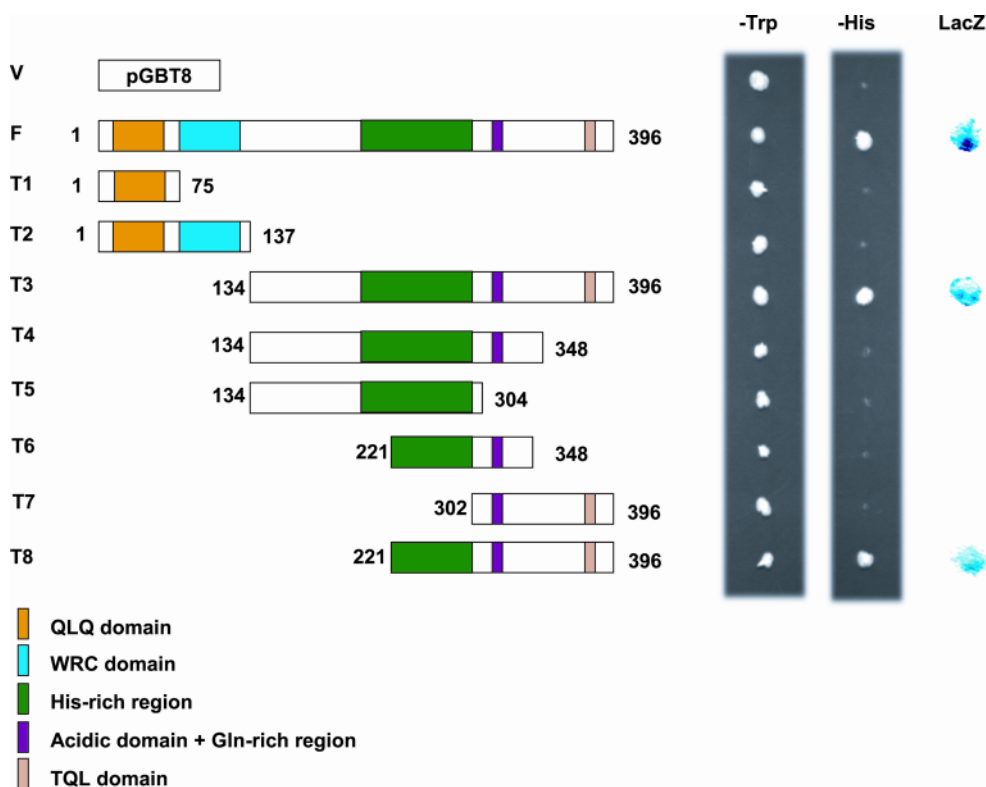

**Fig. 6** Transactivation assay of *OsGRF1*. Each region of the *OsGRF1* protein shown below was fused to the GAL4 DNA-binding domain, expressed in yeast cells, and assayed for its ability to activate the reporter genes *HIS3* and *LacZ*. The numbers in parentheses indicate amino acid positions. V, pGBT8 vector as control; F, full-length sequence of *OsGRF1* (1–396); T1, QLQ domain (1–75); T2, QLQ and WRC domains (1–137); T3, C-terminal part with the His-rich, acidic and Gln-rich regions, and the TQL domain (134–396); T4, C-terminal part without the TQL domain (134–348); T5, C-terminal part without the acidic and Gln-rich regions, and the TQL domain (134–304); T6, His-rich region with the acidic and Gln-rich region (221–348); T7, acidic and Gln-rich region with the TQL domain (302–396); T8, His-rich region with acidic and Gln-rich region and the TQL domain (221–396).

## Materials and Methods

### Growth and treatment of plants

Rice seeds (*Oryza sativa* L., cv. Pin Gaew 56) were obtained from the International Rice Research Institute (Los Baños, Philip-

pines). Seeds were germinated on wet filter paper in the dark at 30°C for 4 d. The plants were grown in a growth chamber according to Stünzi and Kende (1989). Treatment of stem sections with GA<sub>3</sub> was performed as described by Lee and Kende (2001).

### Database searches and gene annotations

Sequences of *OsGRFs* were identified by tBLASTn searches of the rice genome sequence databases of the National Center for Biotechnology Information (<http://www.ncbi.nlm.nih.gov>), the Chinese Super Hybrid Rice genome database (RiceGD, <http://btn.genomics.org.cn:8080/rice/>), and the rice full-length EST database (KOME, <http://cdna01.dna.affrc.go.jp/cDNA/>; Rice Full-Length cDNA Consortium 2003). Open reading frames of *OsGRFs* were predicted with a web-based rice genome automated annotation system (RiceGAAS; Sakata et al. 2002) and the rice full-length EST database.

### Sequence alignment and phylogenetic analysis

Nucleotide and deduced amino acid sequences were analyzed with the DNASTAR program (DNASTAR, Madison, WI, U.S.A.). Multiple sequence alignments were performed with the ClustalW Multiple Sequence Alignment Program of DNASTAR and printed using BOXSHADE 3.20 ([www.ch.embnet.org](http://www.ch.embnet.org)). A phylogenetic tree was generated and displayed with the MegAlign program (DNASTAR).

### RT-PCR for the isolation of *OsGRF2* cDNA

Total RNA was extracted from GA<sub>3</sub>-treated stem sections for the isolation of *OsGRF2* cDNA according to Verwoerd et al. (1989). Five µg of total RNA was subjected to reverse transcription using SuperscriptII (Life Technologies, Rockville, MD, U.S.A.) and 1 µl of oligo(dT)<sub>18</sub> (500 µg ml<sup>-1</sup>) as reverse primer. First strands of cDNA were obtained after incubation at 42°C for 50 min followed by inactivation of the reverse transcriptase at 75°C for 5 min and were used for PCR reactions. PCR reactions were performed with Platinum Pfx DNA Polymerase (Invitrogen, Carlsbad, CA, U.S.A.) for amplification of the *OsGRF2* coding region. *OsGRF2* cDNAs were amplified in 30 cycles of 94°C for 30 s, 52°C for 30 s, 68°C for 1 min, in the presence of the primer sets (forward primer, 5'-AGTAAGCTTGTGCTGGGTGAG-GAG-3'; reverse primer, 5'-CTGGATCCGTTGCGTCTGAGGATT-3'; restriction enzyme sites for *Hind*III and *Bam*HI, underlined). Amplified PCR products digested with *Hind*III and *Bam*HI were cloned in the pBluescript II SK (-) vector (Stratagene, La Jolla, CA, U.S.A.), and the insert was confirmed by restriction digestion and sequencing.

### RNA gel blot analysis of *OsGRFs*

Total RNA was extracted from seedlings and GA<sub>3</sub>-treated stem sections according to Verwoerd et al. (1989). Twenty µg of total RNA were separated electrophoretically in 1% (w/v) formaldehyde-agarose gel (Ausubel et al. 1987), blotted onto Hybond-N+ membrane (Amersham Pharmacia, Piscataway, NJ, U.S.A.), and hybridized to gene-specific probes. The gene-specific probes ranged from 221 to 454 bp in length and were prepared by PCR amplification of genomic DNA that corresponded to the 3' sequences of *OsGRF* genes. Prehybridization and hybridization were performed as described by Kim et al. (2003). The radioactivity on blots was visualized by autoradiography. Hyperfilm MP (Amersham Pharmacia) was exposed for 7 d when *OsGRF* probes were used and for 1 d when 17S rDNA was used. The mRNA levels of *OsGRFs* were determined by PhosphorImager (Molecular Dynamics, Sunnyvale, CA, U.S.A.) analysis and normalized to the 17S rRNA signal.

### Preparation of riboprobes and in situ hybridization

A gene-specific probe corresponding to the 3' untranslated region of *OsGRF1* was prepared by PCR amplification from *OsGRF1* cDNA using the following primers: 5'-TCGAATTCGAGACGACAGCTGTC-3' and 5'-TTGAATTCGCGAGCGAGTACT-3'. The PCR products were digested with *Eco*RI and inserted into pBluescript II SK (-) vector (Stratagene). Sense and antisense RNAs were generated in a reaction mixture containing digoxigenin-UTP using T3 or T7 polymerase

(Boehringer Mannheim, Indianapolis, IN, U.S.A.), depending on the orientation of the inserts. The resulting riboprobes were fragmented to the length of about 100 nucleotides by incubation in 40 mM NaHCO<sub>3</sub>/60 mM Na<sub>2</sub>CO<sub>3</sub>. Preparation of plant tissue sections, in situ hybridization, and slide mounting were performed as described by Cho and Kende (1998) with modification in the prehybridization and hybridization temperature (42°C instead of 37°C).

### Transactivation assay based on the yeast *GAL4* system

cDNA fragments of *OsGRF1* were generated by PCR amplification and fused in-frame to the GAL4 DNA-binding domain in the pGBT8 vector (Clontech, Palo Alto, CA, U.S.A.). The transactivation assay was performed according to the instruction manual of Clontech (PT-3024-1). Competent yeast cells (strain HF7c) were transformed with various pGBT8 constructs and selected on synthetic medium plates (SD medium) lacking tryptophan at 28°C for 2 d. Yeast transformants were streaked on solid SD agar medium lacking tryptophan and histidine to score the growth response after 2 d. For the β-galactosidase assay, the transformants were streaked on a filter paper on top of a medium lacking tryptophan and allowed to grow overnight. Cells grown on the filter were lysed by freezing in liquid nitrogen and thawing, following which the filter was incubated in 2.5 ml of Z buffer (16.1 g liter<sup>-1</sup> Na<sub>2</sub>HPO<sub>4</sub>·7H<sub>2</sub>O, 5.5 g liter<sup>-1</sup> NaH<sub>2</sub>PO<sub>4</sub>·H<sub>2</sub>O, 0.7 g liter<sup>-1</sup> KCl, 0.246 g liter<sup>-1</sup> MgSO<sub>4</sub>·7H<sub>2</sub>O, pH 7.0) containing 800 µg of 5-bromo-4-chloro-3-indolyl β-D-galactopyranoside (X-Gal) at 30°C and monitored for color reaction.

### Supplementary Material

Supplementary material mentioned in the article is available to online subscribers at the journal website [www.pcp.oupjournals.org](http://www.pcp.oupjournals.org).

### Acknowledgment

This research was supported by grant no. IBN 0076524 from the National Science Foundation and grant no. DE-FG-02-91ER20021 from the U.S. Department of Energy.

### References

- Altschul, S.F., Madden, T.L., Schaffer, A.A., Zhang, J.H., Zhang, Z., Miller, W. and Lipman, D.J. (1997) Gapped BLAST and PSI-BLAST: a new generation of protein database search programs. *Nucleic Acids Res.* 25: 3389–3402.
- Ausubel, F.M., Brent, R., Kingston, R.E., Moore, D.D., Seidman, J.G., Smith, J.A. and Struhl, K. (1987) *Current Protocols in Molecular Biology*. Wiley, New York.
- Cho, H.-T. and Kende, H. (1998) Tissue localization of expansins in deepwater rice. *Plant J.* 15: 805–812.
- Escher, D., Bodmer-Glavas, M., Barberis, A. and Schaffner, W. (2000) Conservation of glutamine-rich transactivation function between yeast and humans. *Mol. Cell. Biol.* 20: 2774–2782.
- Gerber, H.P., Seipel, K., Georgiev, O., Höfferer, M., Hug, M., Rusconi, S. and Schaffner, W. (1994) Transcriptional activation modulated by homopolymeric glutamine and proline stretches. *Science* 263: 808–811.
- Goff, S.A., Ricke, D., Lan, T.-H., Presting, G., Wang, R., Dunn, M., Glazebrook, J., Sessions, A., Oeller, P., Varma, H. et al. (2002) A draft sequence of the rice genome (*Oryza sativa* L. ssp. *Japonica*). *Science* 296: 92–100.
- Kende, H., van der Knaap, E. and Cho, H.-T. (1998) Deepwater rice: a model plant to study stem elongation. *Plant Physiol.* 118: 1105–1110.
- Kim, J.H., Choi, D. and Kende, H. (2003) The AtGRF family of putative transcription factors is involved in leaf and cotyledon growth in Arabidopsis. *Plant J.* 36: 94–104.
- Lee, Y., Choi, D. and Kende, H. (2001) Expansins: ever-expanding numbers and functions. *Curr. Opin. Plant Biol.* 4: 527–532.

- Lee, Y. and Kende, H. (2001) Expression of  $\beta$ -expansins is correlated with internodal elongation in deepwater rice. *Plant Physiol.* 127: 645–654.
- Mitchell, P.J. and Tjian, R. (1989) Transcriptional regulation in mammalian cells by sequence-specific DNA binding proteins. *Science* 245: 371–378.
- Raskin, I. and Kende, H. (1984) The role of gibberellin in the growth response of submerged deepwater rice. *Plant Physiol.* 76: 947–950.
- Raventós, D., Skriver, K., Schlein, M., Karnahl, K., Rogers, S.W., Rogers, J.C. and Mundy, J. (1998) HRT, a novel zinc finger, transcriptional repressor from barley. *J. Biol. Chem.* 273: 23313–23320.
- Rice Full-Length cDNA Consortium (2003) Collection, mapping, and annotation of over 28,000 cDNA clones from *japonica* rice. *Science* 301: 376–379.
- Sakata, K., Nagamura, Y., Numa, H., Antonio, B.A., Nagasaki, H., Itonuma, A., Watanabe, W., Shimizu, Y., Horiuchi, I., Matsumoto, T., Sasaki, T. and Higo, K. (2002) RiceGAAS: an automated annotation system and database for rice genome sequence. *Nucleic Acids Res.* 30: 98–102.
- Stünzi, J.T. and Kende, H. (1989) Gas composition in the internal air spaces of deepwater rice in relation to growth induced by submergence. *Plant Cell Physiol.* 30: 49–56.
- Tamai, H., Iwabuchi, M. and Meshi, T. (2002) *Arabidopsis* GARP transcriptional activators interact with the Pro-rich activation domain shared by G-box-binding bZIP factors. *Plant Cell Physiol.* 43: 99–107.
- Treich, I., Cairns, B.R., de los Santos, T., Brewster, E. and Carlson, M. (1995) SNF11, a new component of the yeast SNF-SWI complex that interacts with a conserved region of SNF2. *Mol. Cell. Biol.* 15: 4240–4248.
- van der Knaap, E., Kim, J.H. and Kende, H. (2000) A novel gibberellin-induced gene from rice and its potential regulatory role in stem growth. *Plant Physiol.* 122: 695–704.
- Vaquero, A., Espinas, M.L., Azorin, F. and Bernues, J. (2000) Functional mapping of the GAGA factor assigns its transcriptional activity to the C-terminal glutamine-rich domain. *J. Biol. Chem.* 275: 19461–19468.
- Verwoerd, T.C., Dekker, B.M.M. and Hoekema, A. (1989) A small-scale procedure for the rapid isolation of plant RNAs. *Nucleic Acids Res.* 17: 2362.
- Yanagisawa, S. (2001) The transcriptional activation domain of the plant-specific Dof1 factor functions in plant, animal, and yeast cells. *Plant Cell Physiol.* 42: 813–822.
- Yu, J., Hu, S., Wang, J., Wong, G.K.-S., Li, S., Liu, B., Deng, Y., Dai, L., Zhou, Y., Zhang, X. et al. (2002) A draft sequence of the rice genome (*Oryza sativa* L., ssp. *Indica*). *Science* 296: 79–92.

(Received March 23, 2004; Accepted April 14, 2004)
